# Supplementary material
Source: Springer Nature journal article supplement (https://www.springermedizin.de/resource/supplementary/12936_2009_1135_MOESM3_ESM.pdf/9549946)

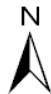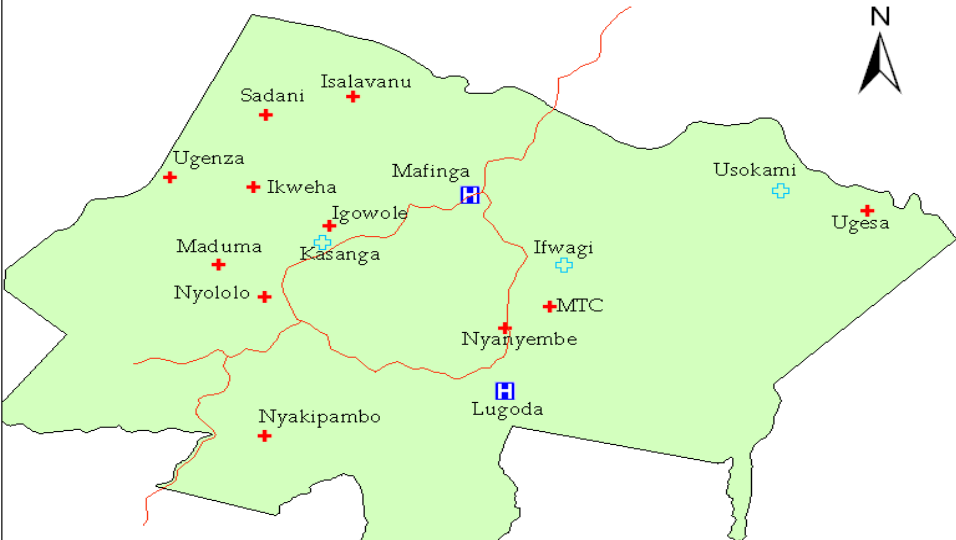

**Legend**

-  Dispensary
-  Health Centre
-  Hospital
-  Road

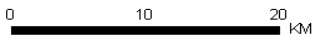

Supplement: MOESM3 [file 9549946]
